# Supplementary material
Source: HighWire-hosted journal article supplement (https://gut.bmj.com/content/71/1/148)

**SUPPLEMENTARY MATERIAL****GLOBAL BURDEN OF DISEASE: ACUTE-ON-CHRONIC LIVER FAILURE, A  
SYSTEMATIC REVIEW AND META-ANALYSIS**

**Gabriel Mezzano, Adria Juanola**, Andrés Cárdenas, Esteban Mezey, James P  
Hamilton, Elisa Pose, Isabel Graupera, Pere Ginès, **Elsa Solà, Ruben Hernaez**

## Contents

|                                                                                                                                                                                                                                                                                                       |    |
|-------------------------------------------------------------------------------------------------------------------------------------------------------------------------------------------------------------------------------------------------------------------------------------------------------|----|
| <b>Supplementary table 1.</b> Literature search criteria last updated 7/3/2020. ....                                                                                                                                                                                                                  | 2  |
| <b>Supplementary table 2.</b> Diagnostic criteria of organ failure(s) (OFs) and acute-on-chronic liver failure (ACLF) according to the EASL CLIF definition. ....                                                                                                                                     | 3  |
| <b>Supplementary Table 3.</b> Newcastle-Ottawa Scale (NOS) .....                                                                                                                                                                                                                                      | 4  |
| <b>Supplementary Table 4.</b> Uniformity of EASL-CLIF definitions of ACLF .....                                                                                                                                                                                                                       | 7  |
| <b>Supplementary Table 5.</b> Loss of follow up .....                                                                                                                                                                                                                                                 | 13 |
| <b>Supplementary table 6.</b> Sensitivity analysis of prevalence (95%CI) data to address statistical heterogeneity .....                                                                                                                                                                              | 15 |
| <b>Supplementary table 7.</b> Sensitivity analysis of 90-day mortality data to address statistical heterogeneity. ....                                                                                                                                                                                | 16 |
| <b>Supplementary table 8.</b> Differences in prevalence and mortality using meta-regression analysis and adjusting for different underlying etiologies and triggers. Summary of multiple-corrections corrected p-values highlighting significant vs. non statistically significant results (NO). .... | 17 |
| <b>Supplementary Table 9.</b> Egger’s test p-values for small-study effects by Prevalence or 90-day Mortality analysis .....                                                                                                                                                                          | 18 |
| <b>Supplementary figure 1.</b> Flow chart of study selection. ....                                                                                                                                                                                                                                    | 19 |
| <b>Supplementary figure 2.</b> Prevalence of ACLF by grade. ....                                                                                                                                                                                                                                      | 20 |
| <b>Supplementary figure 3.</b> 90-day mortality by grade. ....                                                                                                                                                                                                                                        | 21 |
| <b>Supplementary figure 4.</b> 28-day mortality. ....                                                                                                                                                                                                                                                 | 22 |
| <b>Supplementary Figure 5.</b> Funnel Plots in Prevalence and 90-Day mortality of ACLF presence and grades. ....                                                                                                                                                                                      | 23 |

**Supplementary Table 1.** Literature search criteria last updated on July 3<sup>rd</sup>, 2020.

Pubmed:

((acute-on-chronic liver failure) AND (mortality OR transplant) AND ("2013/03/01"[Date - Entrez] : "3000"[Date - Entrez])) NOT review

Embase:

'acute on chronic' AND ('liver' OR 'liver'/exp OR liver) AND ('failure' OR 'failure'/exp OR failure) AND ('mortality' OR 'mortality'/exp OR mortality) NOT ('review' OR 'review'/exp OR review) AND [embase]/lim AND [01-3-2013]/sd

**Supplementary table 2.** Diagnostic criteria of organ failure(s) (OFs) and acute-on-chronic liver failure (ACLF) according to the EASL CLIF definition (11).

| <b>Organ failure definition</b>                    |                                                                                                                    |
|----------------------------------------------------|--------------------------------------------------------------------------------------------------------------------|
| Liver (bilirubin, mg/dL)                           | ≥12.0                                                                                                              |
| Kidney (creatinine, mg/dL)                         | ≥2.0 or renal replacement therapy                                                                                  |
| Brain (Hepatic Encephalopathy West Haven Criteria) | Grades 3–4                                                                                                         |
| Coagulation (INR)                                  | ≥2.5                                                                                                               |
| Circulation                                        | Use of vasopressors                                                                                                |
| Lungs                                              | PaO <sub>2</sub> /FiO <sub>2</sub> ≤200 or<br>SpO <sub>2</sub> /FiO <sub>2</sub> ≤214<br>Or mechanical ventilation |

| <b>ACLF definition and grades</b> |                                                                                                                    |
|-----------------------------------|--------------------------------------------------------------------------------------------------------------------|
| No ACLF                           | No organ failure; or single non-kidney organ failure (with serum creatinine <1.5mg/dL and no HE).                  |
| ACLF-1                            | Single kidney failure; or 1 non-kidney organ failure together with serum creatinine 1.5-.1.9mg/dL or grade 1-2 HE. |
| ACLF-2                            | Two organ failures.                                                                                                |
| ACLF-3                            | Three or more organ failures.                                                                                      |

**Supplementary Table 3.** Newcastle-Ottawa Scale (NOS)

| Author                      | ACLF cohort similar to original CANONIC | NON ACLF cohort similar to original CANONIC | Ascertainment of ACLF CANONIC | Use of CANONIC definition | Prevalent ACLF on inception | ACLF and non ACLF comparable? | Follow-up long enough 90 days at least | Adequacy of follow-up | Total |
|-----------------------------|-----------------------------------------|---------------------------------------------|-------------------------------|---------------------------|-----------------------------|-------------------------------|----------------------------------------|-----------------------|-------|
| <b>Europe</b>               |                                         |                                             |                               |                           |                             |                               |                                        |                       |       |
| Moreau et al 2013 (11)      | 1                                       | 1                                           | 1                             | 1                         | 1                           | 1                             | 1                                      | 1                     | 8     |
| McPhail et al 2016 (19)     | 1                                       | 1                                           | 1                             | 1                         | 0                           | 0                             | 1                                      | 1                     | 6     |
| Barosa et al 2017 (20)      | 1                                       | 1                                           | 1                             | 1                         | 0                           | 1                             | 1                                      | 1                     | 7     |
| Alexopoulou et al 2017 (21) | 1                                       | 1                                           | 1                             | 1                         | 0                           | 1                             | 1                                      | 1                     | 7     |
| Huelin et al 2017 (22)      | 1                                       | 1                                           | 1                             | 1                         | 0                           | 1                             | 1                                      | 1                     | 7     |
| Antunes et al 2017 (23)     | 1                                       | 1                                           | 1                             | 1                         | 0                           | 1                             | 1                                      | 1                     | 7     |
| Piano et al 2017 (24)       | 1                                       | 1                                           | 1                             | 1                         | 1                           | 1                             | 1                                      | 0                     | 7     |
| Blasi et al 2019 (25)       | 0                                       | 0                                           | 1                             | 1                         | 0                           | 1                             | 1                                      | 1                     | 5     |
| Perdigoto et al 2019 (26)   | 1                                       | 1                                           | 1                             | 1                         | 0                           | 1                             | 1                                      | 1                     | 7     |

|                            |   |   |   |   |   |   |   |   |   |
|----------------------------|---|---|---|---|---|---|---|---|---|
| Ferreira et al 2019 (27)   | 1 | 1 | 1 | 1 | 1 | 1 | 1 | 1 | 8 |
| Mani et al 2019 (28)       | 1 | 1 | 1 | 1 | 1 | 1 | 1 | 1 | 8 |
| Zaccherini et al 2019 (29) | 1 | 0 | 1 | 1 | 1 | 0 | 1 | 1 | 6 |
| Niewinski et al 2020 (30)  | 1 | 1 | 1 | 1 | 1 | 1 | 1 | 1 | 8 |
| <b>South America</b>       |   |   |   |   |   |   |   |   |   |
| Silva et al 2015 (31)      | 1 | 1 | 1 | 1 | 0 | 1 | 1 | 1 | 7 |
| Dominguez et al 2016 (32)  | 1 | 1 | 1 | 1 | 1 | 1 | 0 | 1 | 7 |
| Picon et al 2017 (33)      | 1 | 1 | 1 | 1 | 0 | 1 | 1 | 1 | 7 |
| Rosado et al 2019 (34)     | 1 | 1 | 1 | 1 | 1 | 1 | 0 | 1 | 7 |
| Leao et al 2019 (35)       | 1 | 0 | 1 | 1 | 1 | 0 | 1 | 1 | 6 |
| <b>North America</b>       |   |   |   |   |   |   |   |   |   |
| Hernaez et al 2019 (36)    | 1 | 1 | 1 | 1 | 1 | 1 | 1 | 1 | 8 |
| Sundaram et al 2019 (37)   | 1 | 1 | 1 | 1 | 0 | 1 | 1 | 1 | 7 |

| <b>East Asia</b>                  |   |   |   |   |   |   |   |   |   |
|-----------------------------------|---|---|---|---|---|---|---|---|---|
| Shi et al 2015 (14)               | 1 | 1 | 1 | 1 | 0 | 1 | 1 | 1 | 7 |
| Kim et al 2016 (38)               | 1 | 1 | 1 | 1 | 1 | 1 | 1 | 1 | 8 |
| Shi et al 2017 (39)               | 1 | 1 | 1 | 1 | 0 | 1 | 1 | 1 | 7 |
| Song et al 2018 (40)              | 1 | 1 | 1 | 1 | 0 | 1 | 1 | 1 | 7 |
| <b>South Asia</b>                 |   |   |   |   |   |   |   |   |   |
| Dhiman et al 2014 (41)            | 1 | 1 | 1 | 1 | 1 | 1 | 1 | 1 | 8 |
| Amarapurkar et al 2015 (42)       | 1 | 0 | 1 | 1 | 1 | 0 | 0 | 1 | 4 |
| Gupta et al 2017 (43)             | 1 | 1 | 1 | 1 | 0 | 1 | 1 | 1 | 7 |
| Selva Rajoo et al 2017 (44)       | 1 | 1 | 1 | 1 | 1 | 1 | 1 | 1 | 8 |
| Maipang et al 2019 (45)           | 1 | 0 | 1 | 1 | 1 | 0 | 1 | 1 | 6 |
| Sirimongkol kasem et al 2019 (46) | 1 | 1 | 1 | 1 | 1 | 1 | 1 | 1 | 8 |

Score conversion: 1:yes 0: No

**Supplementary Table 4.** Uniformity of EASL-CLIF definitions of ACLF

| Author                      | ACLF definition    | ACLF grade definition     | Liver failure                     | Kidney failure                                      | Brain failure                                                                      | Coagulation failure                                         | Circulatory failure                                                             | Respiratory failure                                                                                   |
|-----------------------------|--------------------|---------------------------|-----------------------------------|-----------------------------------------------------|------------------------------------------------------------------------------------|-------------------------------------------------------------|---------------------------------------------------------------------------------|-------------------------------------------------------------------------------------------------------|
| <b>Europe</b>               |                    |                           |                                   |                                                     |                                                                                    |                                                             |                                                                                 |                                                                                                       |
| Moreau et al 2013 (11)      | EASL-CLIF criteria | 1,2,3 (see Suppl table 1) | Serum bilirubin $\geq 12.0$ mg/dL | Serum creatinine $\geq 2.0$ mg/dL or the use of RRT | Grade III or IV hepatic encephalopathy, according to the West Haven classification | INR $\geq 2.5$ and/or a platelet count of 20 109/L or below | Use of dopamine, dobutamine, or terlipressin                                    | PaO <sub>2</sub> /FiO <sub>2</sub> ratio < 200 mmHg or SpO <sub>2</sub> /FiO <sub>2</sub> ratio < 200 |
| McPhail et al 2016 (19)     | EASL-CLIF criteria | NR                        | Serum bilirubin > 6 mg/dL         | Serum creatinine $\geq 3.5$ mg/dL                   | Grade III or IV hepatic encephalopathy, according to the West Haven classification | NR                                                          | NR                                                                              | PaO <sub>2</sub> /FiO <sub>2</sub> ratio < 200 mmHg                                                   |
| Barosa et al 2017 (20)      | EASL-CLIF criteria | 1,2,3 (see Suppl table 1) | Serum bilirubin $\geq 12$ mg/dl   | Serum creatinine $\geq 2.0$ mg/dl or the use of RRT | Grade III or IV hepatic encephalopathy, according to the West Haven classification | INR $\geq 2.5$                                              | Use of vasopressors, with the exception of terlipressin in hepatorenal syndrome | SpO <sub>2</sub> /FiO <sub>2</sub> $\leq 214$ or the need for mechanical ventilation                  |
| Alexopoulou et al 2017 (21) | EASL-CLIF          | 1,2,3 (see Suppl          | Serum bilirubin                   | Serum creatinine $\geq$                             | Grade III or IV hepatic                                                            | INR $\geq 2.5$ and/or a                                     | The use of dopamine,                                                            | PaO <sub>2</sub> /FiO <sub>2</sub> ratio < 200 mmHg or an                                             |

|                           |                    |                           |                                                                    |                                                |                                                                                    |                                                       |                                              |                                                                                                      |
|---------------------------|--------------------|---------------------------|--------------------------------------------------------------------|------------------------------------------------|------------------------------------------------------------------------------------|-------------------------------------------------------|----------------------------------------------|------------------------------------------------------------------------------------------------------|
|                           | criteria           | table 1)                  | ≥ 12 mg/dl                                                         | 2.0 mg/dl or the use of RRT                    | encephalopathy, according to the West Haven classification                         | platelet count of 20 109/L or below                   | dobutamine, or terlipressin                  | SpO <sub>2</sub> /FiO <sub>2</sub> ratio <200                                                        |
| Huelin et al 2017 (22)    | EASL-CLIF criteria | 1,2,3 (see Suppl table 1) | Liver failure was defined by a serum bilirubin level of 12.0 mg/dL | Serum creatinine ≥ 2.0 mg/dl or the use of RRT | Grade III or IV hepatic encephalopathy, according to the West Haven classification | INR ≥2.5 and/or a platelet count of 20 109/L or below | Use of dopamine, dobutamine, or terlipressin | PaO <sub>2</sub> /FiO <sub>2</sub> ratio < 200 mmHg or SpO <sub>2</sub> /FiO <sub>2</sub> ratio <200 |
| Antunes et al 2017 (23)   | EASL-CLIF criteria | NR                        | NR                                                                 | NR                                             | NR                                                                                 | NR                                                    | NR                                           | NR                                                                                                   |
| Piano et al 2017 (24)     | EASL-CLIF criteria | 1,2,3 (see Suppl table 1) | NR                                                                 | NR                                             | NR                                                                                 | NR                                                    | NR                                           | NR                                                                                                   |
| Blasi et al 2019 (25)     | EASL-CLIF criteria | NR                        | NR                                                                 | NR                                             | NR                                                                                 | NR                                                    | NR                                           | NR                                                                                                   |
| Perdigoto et al 2019 (26) | EASL-CLIF criteria | 1,2,3 (see Suppl table 1) | Serum bilirubin ≥ 12                                               | Serum creatinine >2.0 mg/dL                    | Grade III or IV hepatic encephalopathy                                             | NA                                                    | Use of vasopressors                          | NA                                                                                                   |
| Ferreira et al 2019 (27)  | EASL-CLIF criteria | 1,2,3 (see Suppl table 1) | Serum bilirubin ≥12.0                                              | Serum creatinine ≥ 2.0 mg/dL or                | Grade III or IV hepatic encephalopathy,                                            | INR ≥2.5 and/or a platelet                            | Use of dopamine, dobutamine, or              | PaO <sub>2</sub> /FiO <sub>2</sub> ratio < 200 mmHg or SpO <sub>2</sub> /FiO <sub>2</sub> ratio      |



|                            |                    |                           |                                   |                                                                         |                                                                                    |                                                             |                                              |                                                                                                      |
|----------------------------|--------------------|---------------------------|-----------------------------------|-------------------------------------------------------------------------|------------------------------------------------------------------------------------|-------------------------------------------------------------|----------------------------------------------|------------------------------------------------------------------------------------------------------|
|                            |                    |                           | mg/dL                             | the use of RRT                                                          | according to the West Haven classification                                         | count of 20 109/L or below                                  | terlipressin                                 | <200                                                                                                 |
| Mani et al 2019 (28)       | EASL-CLIF criteria | 1,2,3 (see Suppl table 1) | Serum bilirubin $\geq 12.0$ mg/dL | Serum creatinine $\geq 2.0$ mg/dL or the use of RRT                     | Grade III or IV hepatic encephalopathy, according to the West Haven classification | INR $\geq 2.5$ and/or a platelet count of 20 109/L or below | Use of dopamine, dobutamine, or terlipressin | PaO <sub>2</sub> /FiO <sub>2</sub> ratio < 200 mmHg or SpO <sub>2</sub> /FiO <sub>2</sub> ratio <200 |
| Zaccherini et al 2019 (29) | EASL-CLIF criteria | NR                        | Serum bilirubin $\geq 12.0$ mg/dL | Serum creatinine $\geq 2.0$ mg/dL or the use of RRT replacement therapy | Grade III or IV hepatic encephalopathy, according to the West Haven classification | INR $\geq 2.5$ and/or a platelet count of 20 109/L or below | Use of dopamine, dobutamine, or terlipressin | PaO <sub>2</sub> /FiO <sub>2</sub> ratio < 200 mmHg or SpO <sub>2</sub> /FiO <sub>2</sub> ratio <200 |
| Niewinski et al 2020 (30)  | EASL-CLIF criteria | NR                        | NR                                | NR                                                                      | NR                                                                                 | NR                                                          | NR                                           | NR                                                                                                   |
| <b>South America</b>       |                    |                           |                                   |                                                                         |                                                                                    |                                                             |                                              |                                                                                                      |
| Silva et al 2015 (31)      | EASL-CLIF criteria | 1,2,3 (see Suppl table 1) | NR                                | NR                                                                      | NR                                                                                 | NR                                                          | NR                                           | NR                                                                                                   |
| Dominguez et al 2016 (32)  | EASL-CLIF criteria | 1,2,3 (see Suppl table 1) | Serum bilirubin $\geq 12.0$ mg/dL | Serum creatinine $\geq 2.0$ mg/dL or the use of RRT replacement         | Grade III or IV hepatic encephalopathy, according to the West Haven classification | INR $\geq 2.5$ and/or a platelet count of 20 109/L or below | Use of dopamine, dobutamine, or terlipressin | PaO <sub>2</sub> /FiO <sub>2</sub> ratio < 200 mmHg or SpO <sub>2</sub> /FiO <sub>2</sub> ratio <200 |

|                          |                    |                           |                             |                                                                               |                                                                          |           |                                                                                                            |                                                               |
|--------------------------|--------------------|---------------------------|-----------------------------|-------------------------------------------------------------------------------|--------------------------------------------------------------------------|-----------|------------------------------------------------------------------------------------------------------------|---------------------------------------------------------------|
|                          |                    |                           |                             | therapy                                                                       |                                                                          |           |                                                                                                            |                                                               |
| Picon et al 2017 (33)    | EASL-CLIF criteria | 1,2,3 (see Suppl table 1) | NR                          | NR                                                                            | NR                                                                       | NR        | NR                                                                                                         | NR                                                            |
| Rosado et al 2019 (34)   | EASL-CLIF criteria | 1,2,3 (see Suppl table 1) | NR                          | NR                                                                            | NR                                                                       | NR        | NR                                                                                                         | NR                                                            |
| Leao et al 2019 (35)     | EASL-CLIF criteria | 1,2,3 (see Suppl table 1) | NR                          | Serum creatinine > 2mg/dl                                                     | NR                                                                       | NR        | NR                                                                                                         | NR                                                            |
| <b>North America</b>     |                    |                           |                             |                                                                               |                                                                          |           |                                                                                                            |                                                               |
| Hernaez et al 2019 (36)  | EASL-CLIF criteria | 1,2,3 (see Suppl table 1) | Serum bilirubin ≥12.0 mg/dL | Serum creatinine > 2mg/dl or need of RRT (based on ICD-9 or CPT codes)        | Hepatic encephalopathy present as diagnosis code during hospital stay    | INR > 2.5 | MAP < 60 mmHg and/or use of any doses of IV epinephrine, norepinephrine, dobutamine, dopamine, vasopressin | Need for mechanical ventilation (based on ICD-9 or CPT codes) |
| Sundaram et al 2019 (37) | EASL-CLIF criteria | 1,2,3 (see Suppl table 1) | Serum bilirubin ≥ 12mg/dl   | Insufficiency: creatinine 1.5–1.9 mg/dL Failure: creatinine >2.0 mg/dL or RRT | Grade III and IV hepatic encephalopathy according to West Haven criteria | INR > 2.5 | Use of vasopressors                                                                                        | Use of mechanical ventilation                                 |

| <b>East Asia</b>            |                    |                           |                                         |                                            |                                                                          |                                      |                                                                            |                                                                                                                         |
|-----------------------------|--------------------|---------------------------|-----------------------------------------|--------------------------------------------|--------------------------------------------------------------------------|--------------------------------------|----------------------------------------------------------------------------|-------------------------------------------------------------------------------------------------------------------------|
| Shi et al 2015 (14)         | EASL-CLIF criteria | 1,2,3 (see Suppl table 1) | Serum bilirubin >12 mg/dL or 204 µmol/L | Serum creatinine > 2.0 mg/dL or 176 µmol/L | Grade III and IV hepatic encephalopathy according to West Haven criteria | INR > 2.5 or platelet count < 20.000 | MAP < 70mmHg or need for vasopressors                                      | PaO <sub>2</sub> /FiO <sub>2</sub> < 200 or SpO <sub>2</sub> /FiO <sub>2</sub> < 214 or need for mechanical ventilation |
| Kim et al 2016 (38)         | EASL-CLIF criteria | NR                        | NR                                      | NR                                         | NR                                                                       | NR                                   | NR                                                                         | NR                                                                                                                      |
| Shi et al 2017 (39)         | EASL-CLIF criteria | NR                        | NR                                      | NR                                         | NR                                                                       | NR                                   | NR                                                                         | NR                                                                                                                      |
| Song et al 2018 (40)        | EASL-CLIF criteria | 1,2,3 (see Suppl table 1) | NR                                      | NR                                         | NR                                                                       | NR                                   | NR                                                                         | NR                                                                                                                      |
| <b>South Asia</b>           |                    |                           |                                         |                                            |                                                                          |                                      |                                                                            |                                                                                                                         |
| Dhiman et al 2014 (41)      | EASL-CLIF criteria | 1,2,3 (see Suppl table 1) | Serum bilirubin > 12mg/dl               | Serum creatinine > 2mg/dl or need of RRT   | Grade III and IV hepatic encephalopathy according to West Haven criteria | INR > 2.5 or platelet count < 20.000 | Use of vasopressors like dopamine, dobutamine, or terlipressin at any dose | PaO <sub>2</sub> /FiO <sub>2</sub> < 200 or SpO <sub>2</sub> /FiO <sub>2</sub> < 214                                    |
| Amarapurkar et al 2015 (42) | EASL-CLIF criteria | 1,2,3 (see Suppl table 1) | Serum bilirubin > 12mg/dl               | Serum creatinine > 2mg/dl or need for RRT  | Grade III and IV hepatic encephalopathy according to West Haven criteria | INR > 2.5 or platelet count < 20.000 | Use of vasopressors                                                        | PaO <sub>2</sub> /FiO <sub>2</sub> < 200 or SpO <sub>2</sub> /FiO <sub>2</sub> < 214                                    |

|                                  |                    |                           |                           |                                           |                                                                          |                                      |                                       |                                                                                                                         |
|----------------------------------|--------------------|---------------------------|---------------------------|-------------------------------------------|--------------------------------------------------------------------------|--------------------------------------|---------------------------------------|-------------------------------------------------------------------------------------------------------------------------|
| Gupta et al 2017 (43)            | EASL-CLIF criteria | 1,2,3 (see Suppl table 1) | Serum bilirubin > 12mg/dl | Serum creatinine > 2mg/dl or need for RRT | Grade III and IV hepatic encephalopathy according to West Haven criteria | INR > 2.5 or platelet count < 20.000 | MAP < 70mmHg or need for vasopressors | PaO <sub>2</sub> /FiO <sub>2</sub> < 200 or SpO <sub>2</sub> /FiO <sub>2</sub> < 214                                    |
| Selva Rajoo et al 2017 (44)      | EASL-CLIF criteria | NR                        | NR                        | NR                                        | NR                                                                       | NR                                   | NR                                    | NR                                                                                                                      |
| Maipang et al 2019 (45)          | EASL-CLIF criteria | 1,2,3 (see Suppl table 1) | Serum bilirubin > 12mg/dl | Serum creatinine > 2mg/dl or need for RRT | Grade III and IV hepatic encephalopathy according to West Haven criteria | INR > 2.5 or platelet count < 20.000 | MAP < 70mmHg or need for vasopressors | PaO <sub>2</sub> /FiO <sub>2</sub> < 200 or SpO <sub>2</sub> /FiO <sub>2</sub> < 214 or need for mechanical ventilation |
| Sirimongkolkasem et al 2019 (46) | EASL-CLIF criteria | NR                        | NR                        | NR                                        | NR                                                                       | NR                                   | NR                                    | NR                                                                                                                      |

**Supplementary Table 5.** Loss of follow up

| <b>Author</b>               | <b>Loss of follow up</b>         |
|-----------------------------|----------------------------------|
| <b>Europe</b>               |                                  |
| Moreau et al 2013 (11)      | All at inception / less than 15% |
| McPhail et al 2016 (19)     | All at inception / less than 15% |
| Barosa et al 2017 (20)      | All at inception / less than 15% |
| Alexopoulou et al 2017 (21) | All at inception / less than 15% |
| Huelin et al 2017 (22)      | All at inception / less than 15% |
| Antunes et al 2017 (23)     | NA (not available)               |
| Piano et al 2017 (24)       | All at inception / less than 15% |
| Blasi et al 2019 (25)       | All at inception / less than 15% |
| Perdigoto et al 2019 (26)   | NA                               |
| Ferreira et al 2019 (27)    | NA                               |
| Mani et al 2019 (28)        | NA                               |
| Zaccherini et al 2019 (29)  | NA                               |
| Niewinski et al 2020 (30)   | NA                               |
| <b>South America</b>        |                                  |
| Silva et al 2015 (31)       | NA                               |
| Dominguez et al 2016 (32)   | NA                               |
| Picon et al 2017 (33)       | All at inception / less than 15% |
| Rosado et al 2019 (34)      | All at inception / less than 15% |
| Leao et al 2019 (35)        | All at inception / less than 15% |
| <b>North America</b>        |                                  |
| Hernaez et al 2019 (36)     | NA                               |
| Sundaram et al 2019 (37)    | NA                               |
| <b>East Asia</b>            |                                  |
| Shi et al 2015 (14)         | All at inception / less than 15% |
| Kim et al 2016 (38)         | All at inception / less than 15% |
| Shi et al 2017 (39)         | All at inception / less than 15% |
| Song et al 2018 (40)        | All at inception / less than 15% |
| <b>South Asia</b>           |                                  |

|                                  |                                  |
|----------------------------------|----------------------------------|
| Dhiman et al 2014 (41)           | All at inception / less than 15% |
| Amarapurkar et al 2015 (42)      | All at inception / less than 15% |
| Gupta et al 2017 (43)            | All at inception / less than 15% |
| Selva Rajoo et al 2017 (44)      | NA                               |
| Maipang et al 2019 (45)          | NA                               |
| Sirimongkolkasem et al 2019 (46) | NA                               |

**Supplementary table 6.** Sensitivity analysis of prevalence (95%CI) data to address statistical heterogeneity

|                                            | <b>ACLF</b>         | <b>ACLF-1</b>       | <b>ACLF-2</b>       | <b>ACLF-3</b>       |
|--------------------------------------------|---------------------|---------------------|---------------------|---------------------|
| <b>Main findings</b>                       | <b>35 (33 – 38)</b> | <b>44 (41 – 47)</b> | <b>32 (28 – 35)</b> | <b>21 (17 – 24)</b> |
| <b>Prospective</b>                         | <b>40 (33 – 47)</b> | <b>45 (37 – 53)</b> | 33 (26 – 39)        | 20 (14 – 24)        |
| <b>Retrospective</b>                       | <b>30 (26 – 33)</b> | <b>44 (39 – 48)</b> | <b>30 (25 – 35)</b> | <b>22 (15 – 29)</b> |
| <b>NOS<math>\geq</math>5</b>               | <b>35 (33 – 38)</b> | <b>44 (41 – 47)</b> | 32 (28 – 35)        | <b>21 (17 – 24)</b> |
| <b>UHC &lt; 10<sup>th</sup> percentile</b> | <b>64 (49 – 79)</b> | <b>17 (8 – 26)</b>  | <b>37 (26 – 49)</b> | <b>41 (30 – 53)</b> |

NOS, Newcastle-Ottawa Scale; UHC, Universal Health Coverage Index.

Blue shadow highlights major differences

**Supplementary table 7.** Sensitivity analysis of 90-day mortality data to address statistical heterogeneity.

|                                            | <b>ACLF</b>         | <b>ACLF-1</b>       | <b>ACLF-2</b>       | <b>ACLF-3</b>       |
|--------------------------------------------|---------------------|---------------------|---------------------|---------------------|
| <b>Main findings</b>                       | <b>58 (55 – 61)</b> | <b>32 (29 – 35)</b> | <b>55 (50 – 60)</b> | <b>80 (75 – 85)</b> |
| <b>Prospective</b>                         | <b>60 (54 – 66)</b> | <b>38 (32 – 43)</b> | <b>62 (52 – 72)</b> | <b>83 (79 – 88)</b> |
| <b>Retrospective</b>                       | <b>55 (50 – 59)</b> | <b>29 (26 – 32)</b> | <b>47 (42 – 52)</b> | <b>77 (71 – 83)</b> |
| <b>NOS<math>\geq</math>5</b>               | 59 (55 – 62)        | 32 (29 – 35)        | 55 (50 – 60)        | 80 (75 – 85)        |
| <b>UHC &lt; 10<sup>th</sup> percentile</b> | <b>73 (64 – 82)</b> | <b>27 (10 – 57)</b> | <b>79 (52 – 92)</b> | --                  |

NOS, Newcastle-Ottawa Scale; UHC, Universal Health Coverage Index.

Blue shadow highlights major differences



**Supplementary Table 8.** Differences in prevalence and mortality using meta-regression analysis and adjusting for different underlying etiologies and triggers. Summary of multiple-corrections corrected p-values highlighting significant vs. non statistically significant results (NO).

|                   | Etiology Chronic Liver Disease  |                              | Triggers                     |                              |                              |                   |
|-------------------|---------------------------------|------------------------------|------------------------------|------------------------------|------------------------------|-------------------|
|                   | Alcohol                         | Viral                        | Alcohol                      | Infection                    | GIB                          | Viral             |
| <b>Prevalence</b> | Europe and South Asia (0.01)    | Europe and South Asia (0.01) | Europe and South Asia (0.01) | Europe and South Asia (0.01) | Europe and South Asia (0.01) | South Asia (0.01) |
| <b>Mortality</b>  | Europe and North America (0.01) | North-America(0.04)          | NO                           | NO                           | NO                           | NO                |

**Supplementary Table 9.** Egger's test p-values for small-study effects by Prevalence or 90-day Mortality analysis

|          | Prevalence | 90-day mortality |
|----------|------------|------------------|
| ACLF     | 0.05       | <b>&lt;0.01</b>  |
| Non AClF | --         | 0.76             |
| ACLF 1   | 0.46       | 0.22             |
| ACLF-2   | 0.82       | <b>&lt;0.01</b>  |
| ACLF-3   | 0.74       | <b>&lt;0.017</b> |

## Supplementary Figure legends

### Supplementary figure 1. Flow chart of study selection.

Supplementary Figure 1.– Flow Chart

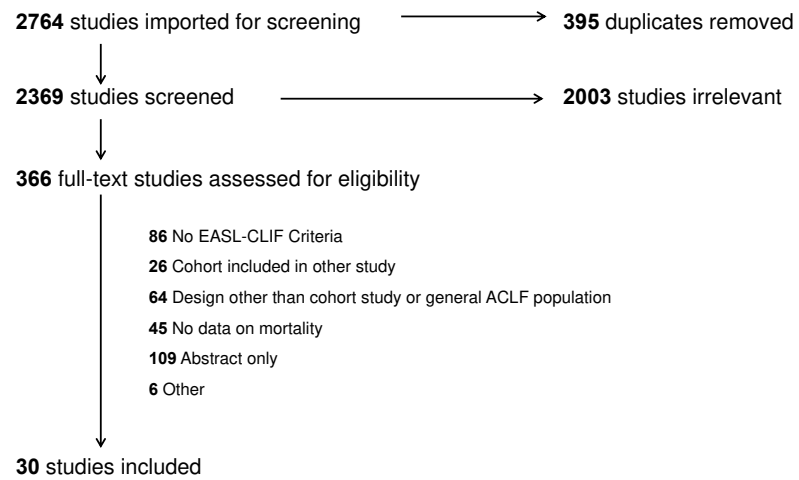

**Supplementary figure 2.** Prevalence of ACLF by grade.

This figure shows the prevalence of ACLF categorized by grade according to the Canonic Study definition (ACLF-1, ACLF-2, ACLF-3). The figure includes data about the prevalence both worldwide and divided by regions (Europe, North and South America, East and South Asia). Numbers are percentages and 95% confidence interval (95%CI).

**Supplementary Figure 2.- Prevalence of ACLF by regions and grade (% , 95% Confidence Interval)**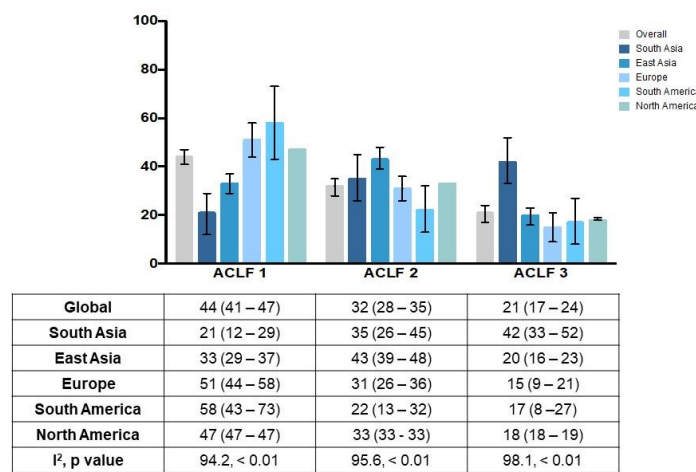

**Supplementary figure 3.** 90-day mortality by grade.

This figure shows the 90-day mortality of patients with ACLF categorized by region (Europe, North and South America, East and South Asia) and grade according to the Canonic Study definition (ACLF-1, ACLF-2, ACLF-3). Numbers are percentages and 95% confidence interval (95%CI).

**Supplementary Figure 3.- 90-day mortality by ACLF grade and regions (% , 95% Confidence Interval)**

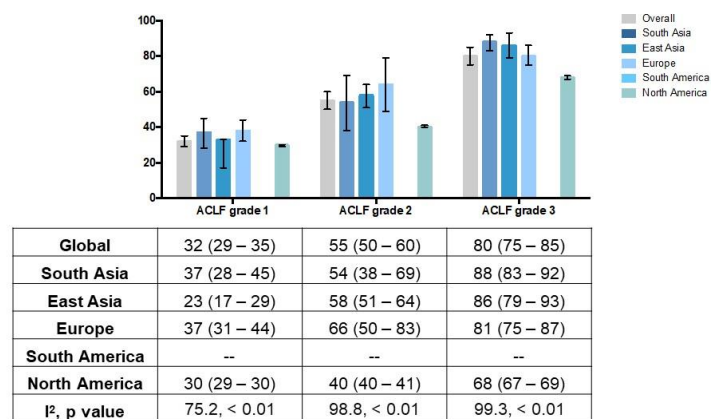

**Supplementary figure 4.** 28-day mortality.

This figure shows 28-day mortality of patients with ACLF worldwide and categorized by region (Europe, North and South America, East and South Asia) and grade according to the Canonic Study definition (ACLF-1, ACLF-2, ACLF-3). Numbers are percentages and 95% confidence interval (95%CI).

**Supplementary Figure 4.- 28-day ACLF mortality by regions (% , 95% Confidence Interval)**

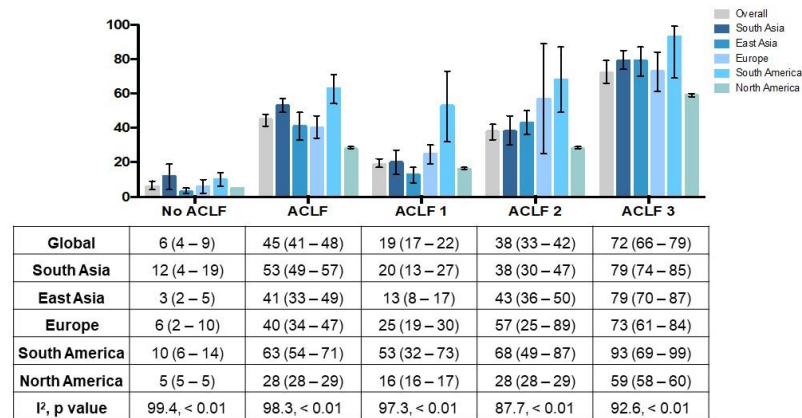

**Supplementary Figure 5.** Funnel Plots in Prevalence and 90-Day mortality of ACLF presence and grades.

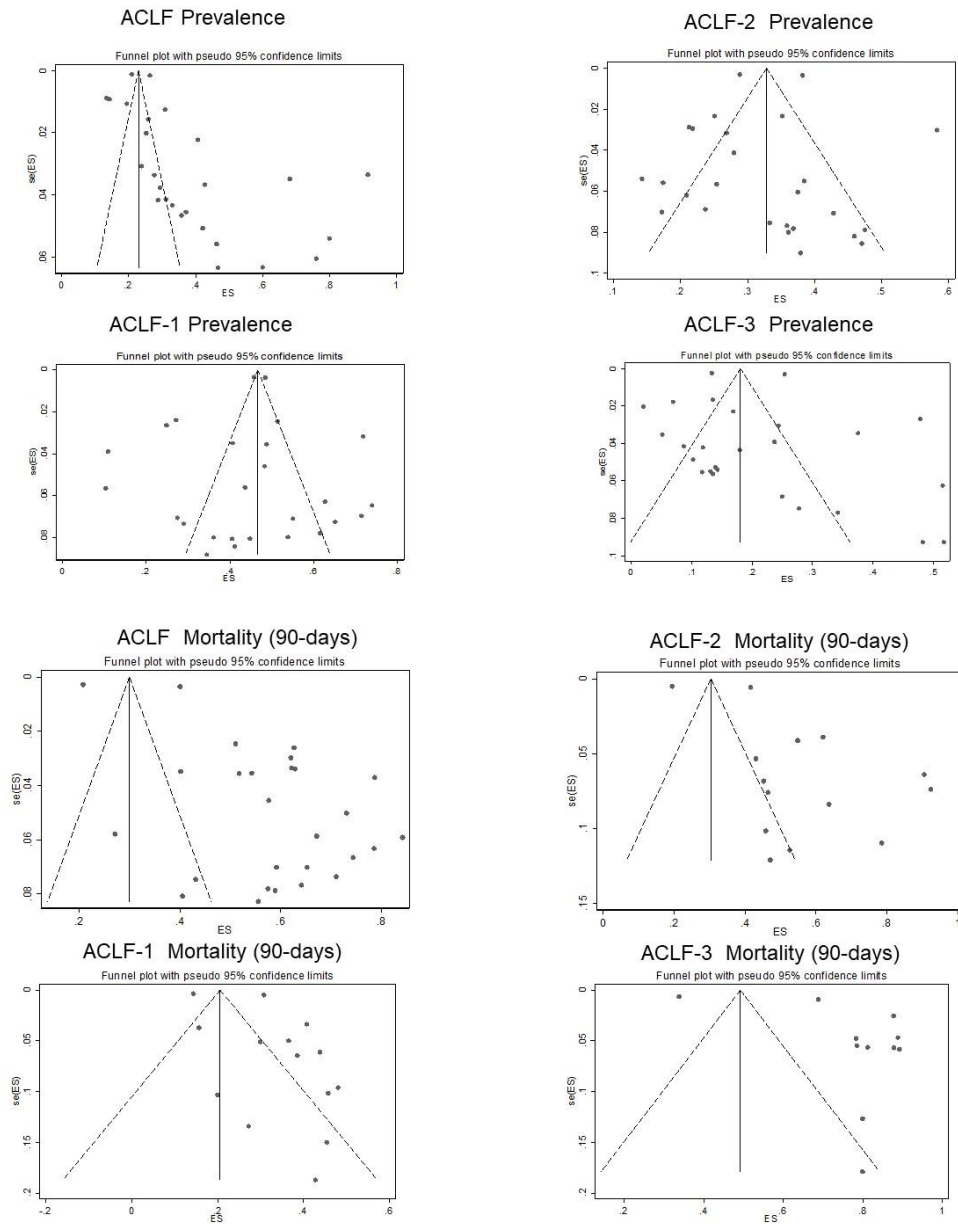

Supplement: inline-supplementary-material-1 [file inline-supplementary-material-1.pdf]
